# Supplementary material
Source: PubMed Central journal article supplement (PMC5868617)

# Supplementary Figure 1

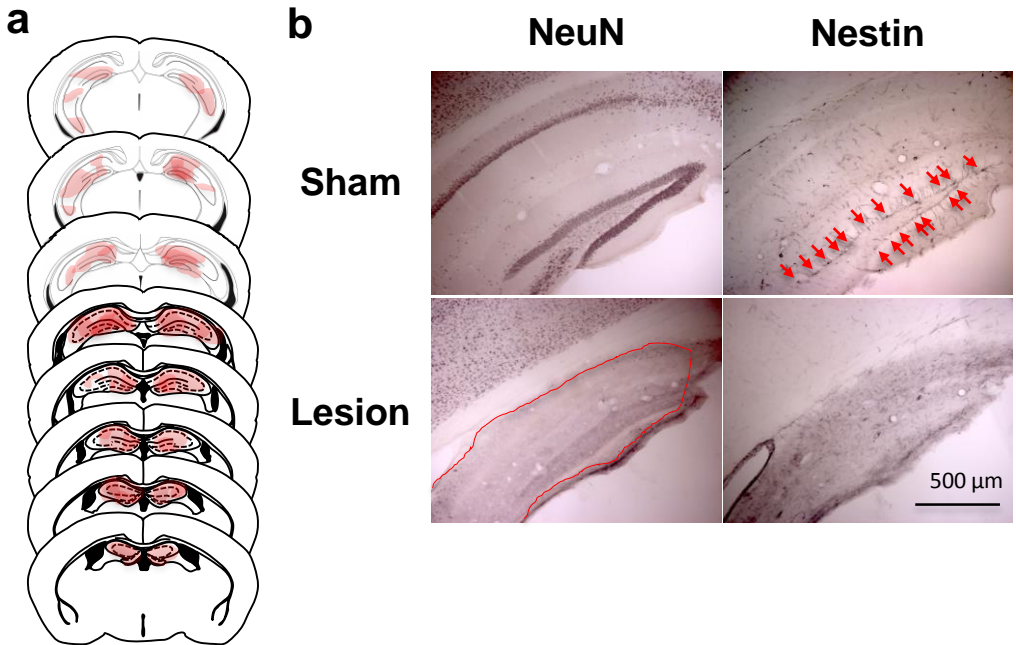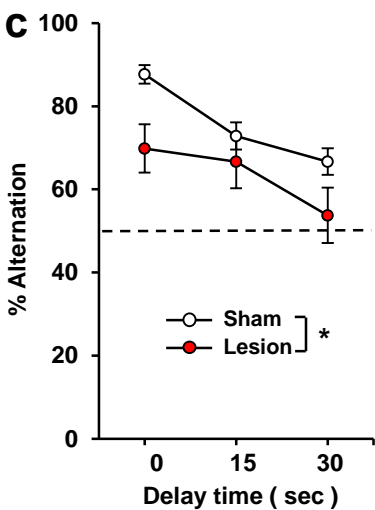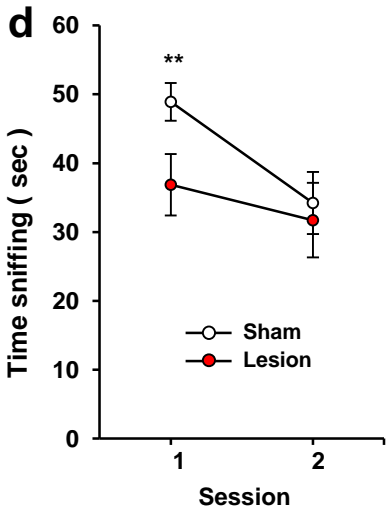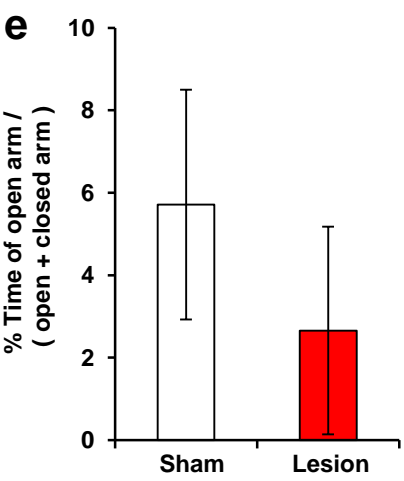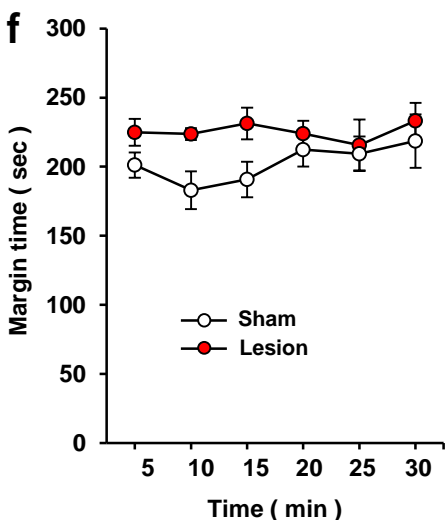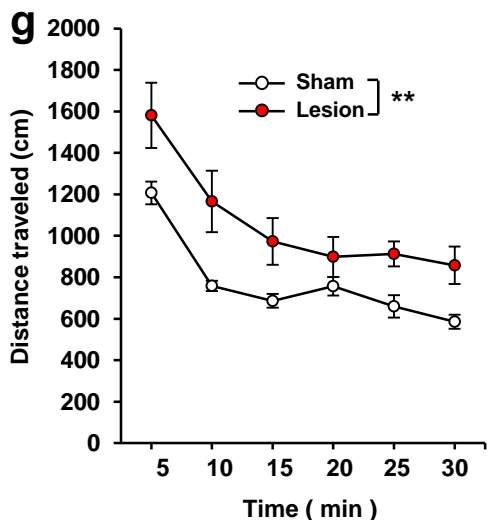

# Supplementary Figure 2

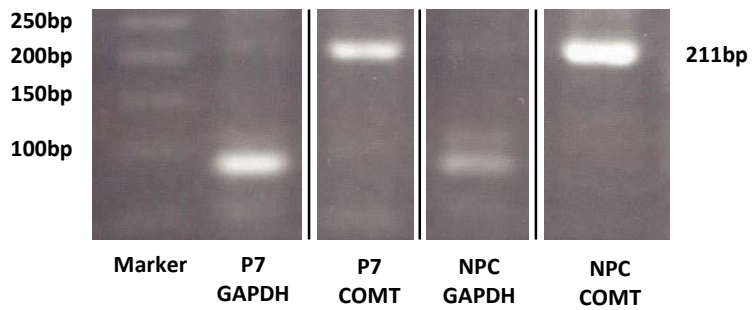

# Supplementary Figure 3

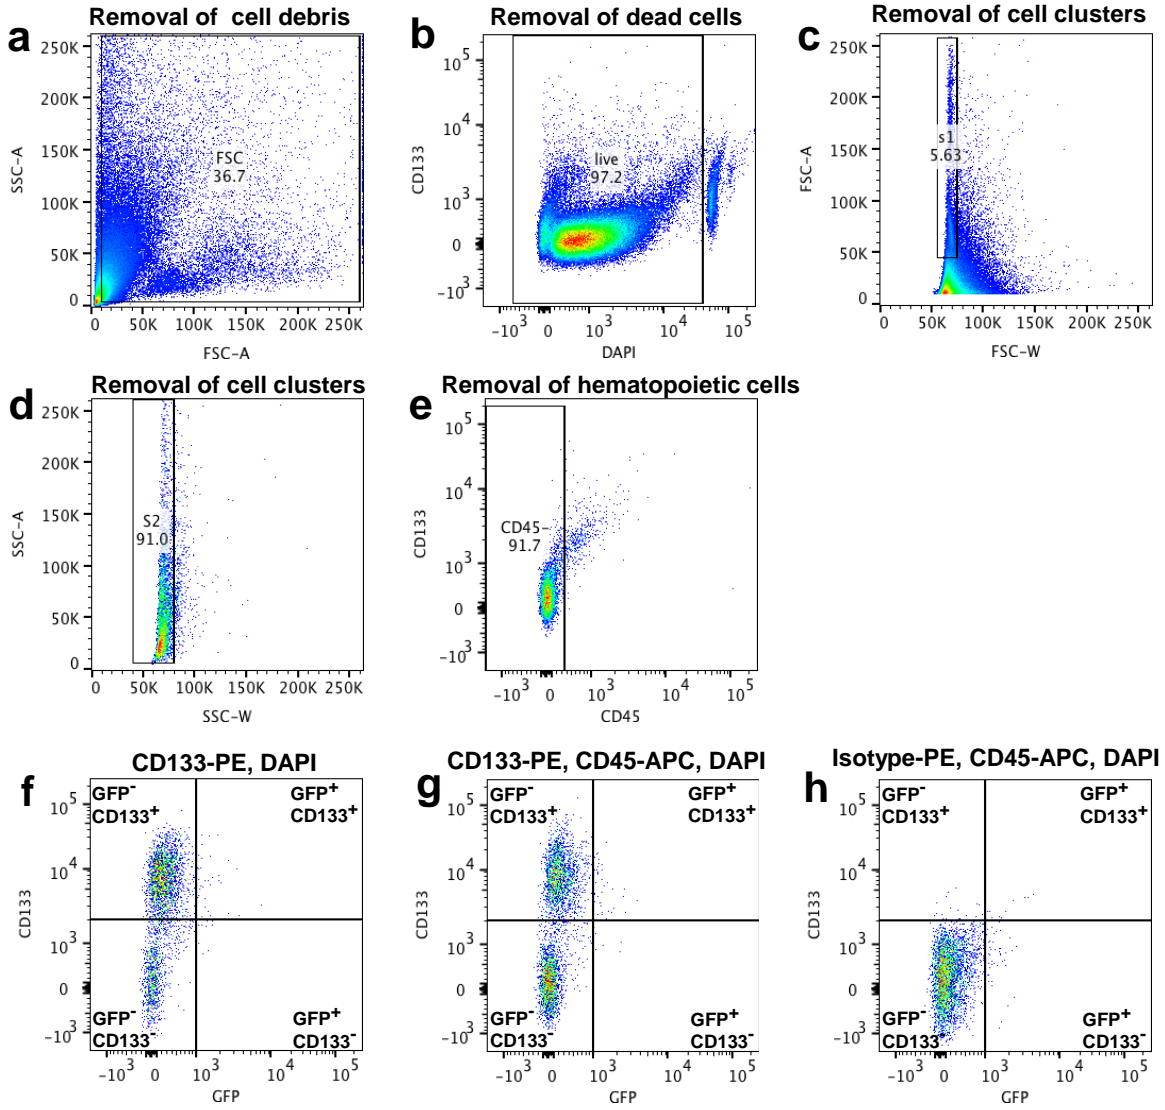

# Supplementary Figure 4

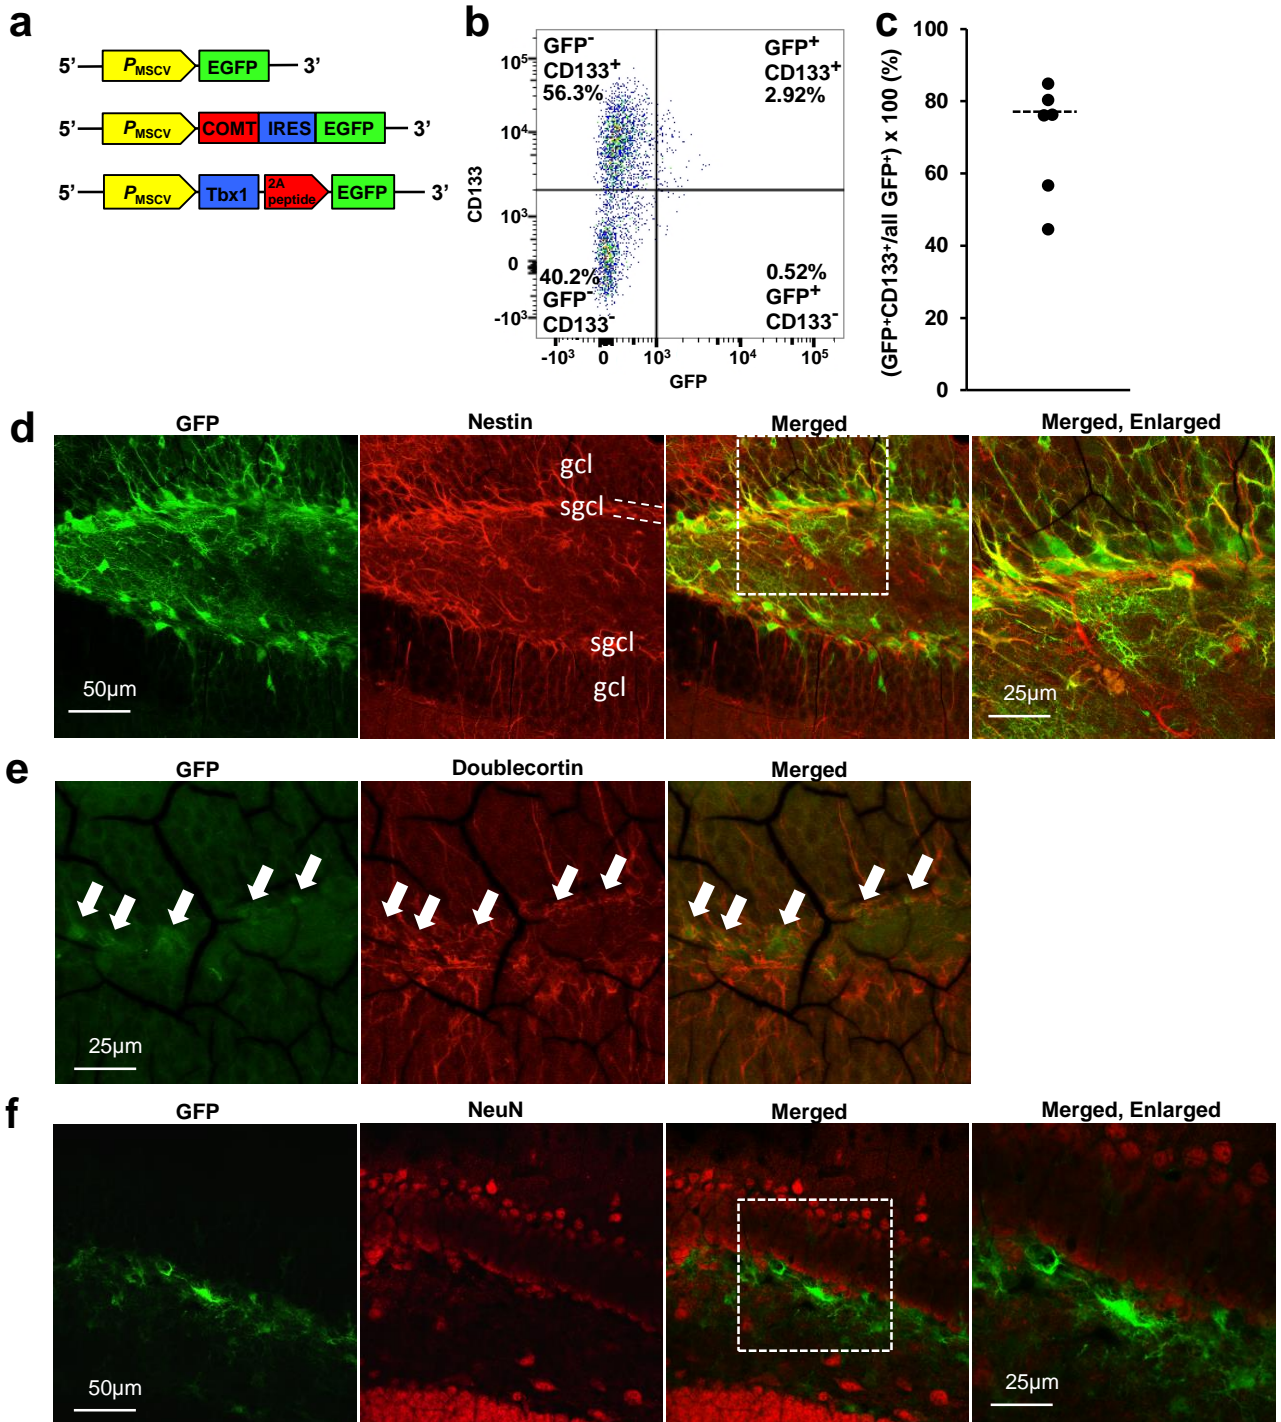

# Supplementary Figure 5

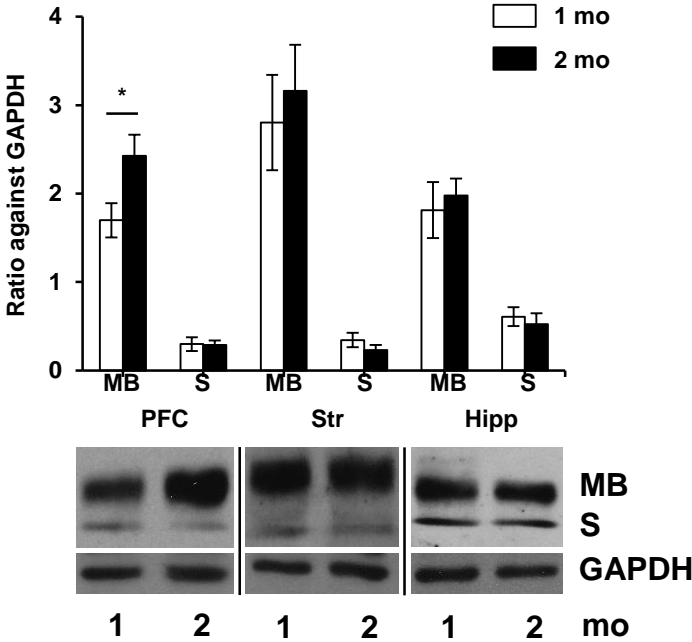

# Supplementary Figure 6

## 1 month COMT

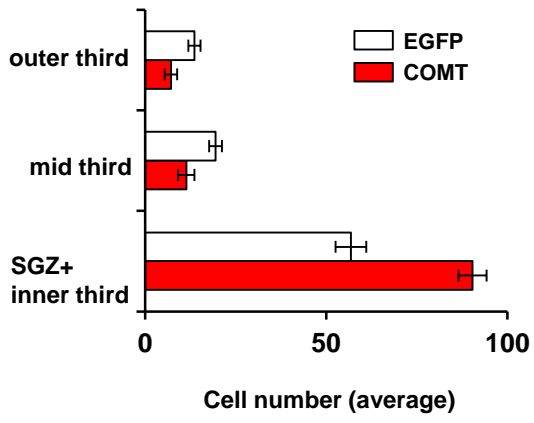

## 2 months COMT

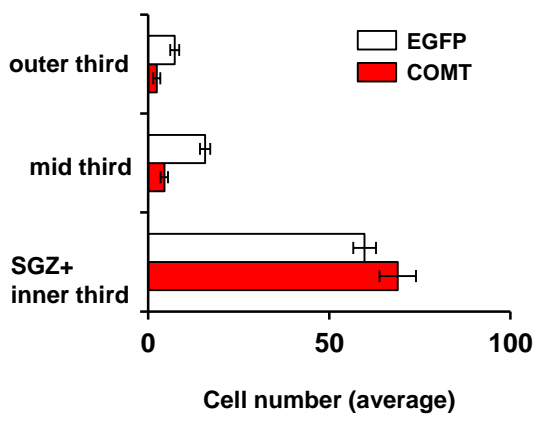

## 1 month Tbx1

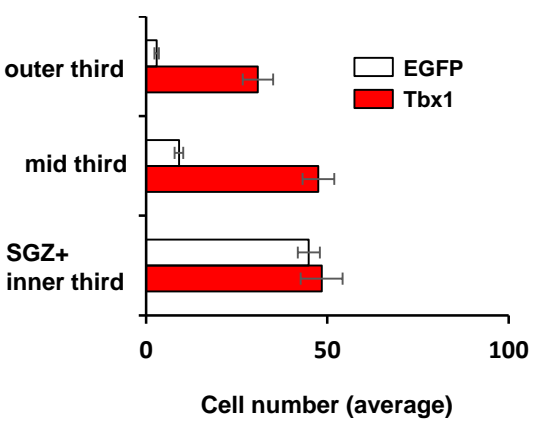

## 2 months Tbx1

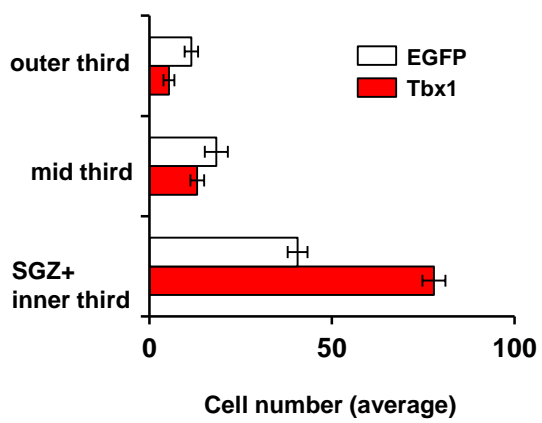

# Supplementary Figure 7

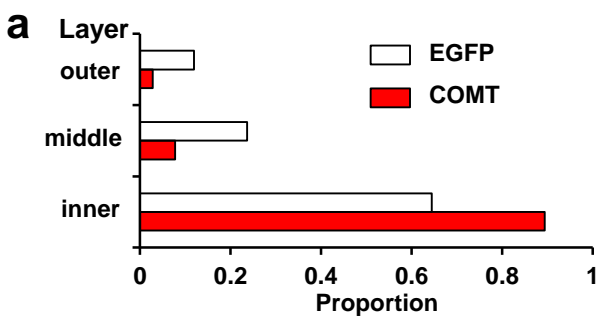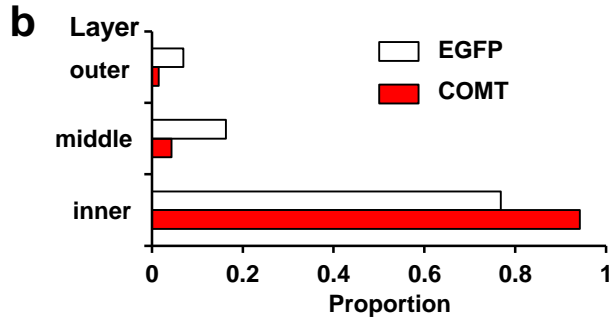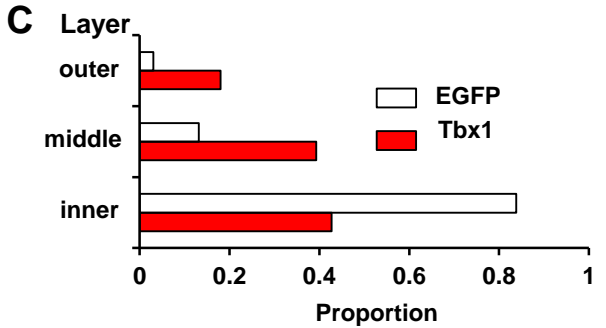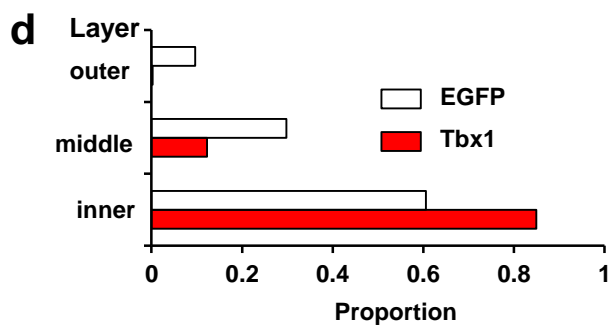

Supplement: mp2017158x2.pdf [file mp2017158x2.pdf]
